# Supplementary material
Source: PubMed Central journal article supplement (PMC3369686)

**Supplemental Table S-1: Peripheral blood cell profiles in wild type and conditional Spry1 null mice**

|                  |                                          |                                           |                                          |                |               |
|------------------|------------------------------------------|-------------------------------------------|------------------------------------------|----------------|---------------|
|                  | <b>#NEUT(<math>10^3</math> cells/ul)</b> | <b>#LYMPH(<math>10^3</math> cells/ul)</b> | <b>#MONO(<math>10^3</math> cells/ul)</b> |                |               |
| <b>Spry1 +/+</b> | 0.85 +/- 0.42                            | 6.15 +/- 0.91                             | 0.08 +/- 0.01                            |                |               |
| <b>Spry1 -/-</b> | 1.12 +/- 0.10                            | 5.17 +/- 1.80                             | 0.07 +/- 0.01                            |                |               |
|                  | <b>WBC(<math>\times 10^3</math>/uL)</b>  | <b>RBC (<math>\times 10^6</math>/uL)</b>  | <b>Plt (<math>\times 10^3</math>/uL)</b> | <b>%NEUT</b>   |               |
| <b>Spry1 +/+</b> | 7.81 +/- 1.25                            | 9.68 +/- 0.60                             | 1564.00 +/- 457                          | 11.70 +/- 4.14 |               |
| <b>Spry1 -/-</b> | 6.90 +/- 1.70                            | 8.97 +/- 0.09                             | 3232.67 +/- 195                          | 15.93 +/- 1.79 |               |
|                  | <b>%LYMPH</b>                            | <b>%MONO</b>                              | <b>%EOS</b>                              | <b>%BASO</b>   | <b>%LUC</b>   |
| <b>Spry1 +/+</b> | 75.20 +/- 6.5                            | 1.10 +/- 0.42                             | 9.57 +/- 2.21                            | 0.60 +/- 0.05  | 2.10 +/- 0.40 |
| <b>Spry1 -/-</b> | 75.60 +/- 7.7                            | 1.17 +/- 0.26                             | 5.13 +/- 6.4                             | 0.50 +/- 0.10  | 1.90 +/- 0.47 |
|                  | <b>#EOS(<math>10^3</math> cells/ul)</b>  | <b>#BASO(<math>10^3</math> cells/ul)</b>  | <b>#LUC(<math>10^3</math> cells/ul)</b>  |                |               |
| <b>Spry1 +/+</b> | 0.52 +/- 0.21                            | 0.04 +/- 0.003                            | 0.18 +/- 0.05                            |                |               |
| <b>Spry1 -/-</b> | 0.38 +/- 0.22                            | 0.03 +/- 0.005                            | 0.14 +/- 0.06                            |                |               |

Values are means +/- SE (n=3)

Supplemental Table S-2 BFUe and CFUe frequencies at steady state  
in control vs conditional *Spry1*-null mice

|                             | <u>BFUe</u><br><u>(2 x 10<sup>5</sup>)</u> | <u>CFUe</u><br><u>(2 x 10<sup>5</sup>)</u> |
|-----------------------------|--------------------------------------------|--------------------------------------------|
| <i>Spry1</i> <sup>+/+</sup> | 11 ± 3                                     | 379 ± 29                                   |
| <i>Spry1</i> <sup>-/-</sup> | 10 ± 2                                     | 359 ± 35                                   |

**Supplemental Table S-3. Distributions of E1, E2 and E3 erythroid progenitor cells in wild-type vs. conditional *Spry1*-null mice at steady-state, post-phenylhydrazine (day 4), and post short-term BMT (d13.5).**

**E1, E2 and E3 numbers at steady-state**

|             | <b>wt</b> | <b><i>Spry1</i><sup>-/-</sup></b> |
|-------------|-----------|-----------------------------------|
| total cells | 176784    | 134906                            |
| gated       | 155561    | 123888                            |
| E3          | 10480     | 14491                             |
| E2          | 1537      | 5898                              |
| E1          | ND        | 333                               |

**E1, E2 and E3 numbers post phenylhydrazine (day 4)**

|             | <b>wt</b> | <b><i>Spry1</i><sup>-/-</sup></b> |
|-------------|-----------|-----------------------------------|
| total cells | 71439     | 69080                             |
| gated       | 68584     | 66709                             |
| E3          | 45210     | 45428                             |
| E2          | 3074      | 3784                              |
| E1          | 1232      | 3229                              |

**E1, E2 and E3 numbers post BMT (day 13.5)**

|             | <b>wt</b> | <b><i>Spry1</i><sup>-/-</sup></b> |
|-------------|-----------|-----------------------------------|
| total cells | 125866    | 125753                            |
| gated       | 113133    | 119780                            |
| E3          | 74667     | 86241                             |
| E2          | 1349      | 8204                              |
| E1          | 1660      | 4072                              |

## SUPPLEMENTAL FIGURE LEGENDS

**Supplemental Figure S-1. May-Grumwald stained cytopins of stage E1, E2 and E3 erythroid progenitor cells.** Bone marrow cell preparations were expanded in SP34ex medium for 3.5 days. CFUe-like “E1” cells, “E2” proerythroblasts, and stage “E3” erythroblasts were then isolated (by MACS and/or FACS) and used to prepare cytopins. (For additional details, please also see reference #25).

**Supplemental Figure S-2. Elevated reticulocyte production at steady-state due to conditional Spry1-deletion.** For n=3 plpC-induced and n=3 control (PBS-injected mice), reticulocyte levels (upper panels) and hematocrits (lower panels) were determined (at 3-weeks post termination of plpC dosing).

**Supplemental Figure S-3. Among erythroid progenitors expanded from bone marrow of conditional Spry1-null mice, survival of stage E3 erythroblasts is modestly compromised. A]** Erythroid progenitor cells from bone marrow preparations were expanded in SP34ex medium. At day 3.5, frequencies of YoPro3-positive cells among stage E1, E2 and E3 progenitors were determined. Values are means +/- SE (n=3). **B]** Representative primary data (YoPro3 staining among Ter119<sup>pos</sup> cells) also are illustrated.

**Supplemental Figure S-4. Representative primary mass spectrometry ion-spray data for select EPO/EPOR PY-modulated signal transduction factors.** Data shown are for Spry1, together with select (illustrative) known PY-modulated EPO/EPOR targets.

**Supplemental Figure S-5. Western blot analysis of EPO/EPOR- induced Spry1 phosphorylation at PY53. A]** UT7epo cells were stably transduced with a VSV-G packaged pMSCVneo vector encoding FLAG-epitope tagged wild-type Spry1. Exponentially growing UT7epo-Spry1(Flag) cells were washed thrice, and cultured for 20 hours in the absence of hematopoietic growth factors. Cells then were challenged with EPO (3U/mL). At 15 minutes of EPO-exposure, Igpeal lysates were prepared and subjected to IP (anti-FLAG Sepharose CL4B). Elution was with a FLAG peptide. Samples in the upper panel were western blotted with an anti-PY antibody, and samples in the middle-panel were blotted with an anti-FLAG antibody. For the lower

panel and blot, total cell lysates were probed with an anti-FLAG antibody. **B]** Panels include an EIC (extracted ion chromatogram at a 3.0 ppm tolerance, 723.8113 m/z, z=2) of the Spry1 phosphopeptide, GSNEY\*TEGPSVVK showing both the peak area (AA) and peak height (AH) for each chromatogram. **C]** MS/MS spectra for duplicate EPO-challenged UT7epo samples. For this LCMS analysis, note the similar high-intensity signals (and y- and b- ion signals). **D]** Example MS1 spectrum for EPO-exposed UT7epo cells, and mass identification of PY-Spry1 tryptic peptide (within 1.2 ppm of theoretical mass).

**Supplemental Figure S-6. Effects of ectopically expressed wild-type Spry1(Flag), and Spry1-Y53F(Flag), on UT7epo cell growth.** Stably transduced UT7epo-wt-Spry1 and UT7epo-Spry1-Y53F cells were washed, and plated at  $3 \times 10^5$  cells/mL in the presence of 0.6 U/mL EPO. At 36, 60 and 84 hours, viable cell counts were determined, and are graphed as means  $\pm$  SE (n=3).

**Supplemental Figure S-7. Conditional deletion of Spry1 leads to altered Stat5 activation (PY-phosphorylation) within primary bone marrow- derived proerythroblasts.** Erythroid progenitor cells were expanded from bone marrow (Spry1-null, and controls) in SP34ex cultures. At day 3.5, proerythroblasts were isolated via Lin<sup>pos</sup>-depletion, and CD71<sup>pos</sup>-selection. Cells were then cultured for 5.5 hours in the absence of hematopoietic growth factors, and then EPO-challenged. At 0, 8 and 24 minutes, cells were chilled, collected and lysed. Lysates were then analyzed for levels of PY-Stat5 via western blotting. (PY-Stat1 levels also were assayed, but no significant activation was detectable).

**Supplemental Figure S-8. Mx1-Cre conditional disruption of Spry1 does not result in skewing of Spry -2, -3, or -4 expression levels.** Within primary bone marrow- derived (pro)erythroblasts, Spry transcript levels in knock-out and control mice were assessed by quantitative RT-PCR. Values are expressed (graphed) as ratios of levels in conditional Spry1-null vs control mice.

**E1**

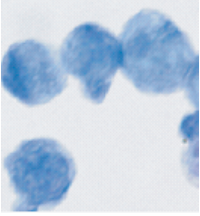

**E2**

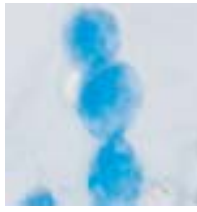

**E3**

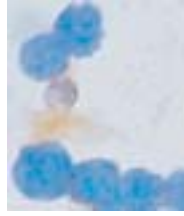

10 micron

**CFUe- like  
progenitors**

**proerythro-  
blasts**

**erythroblasts**

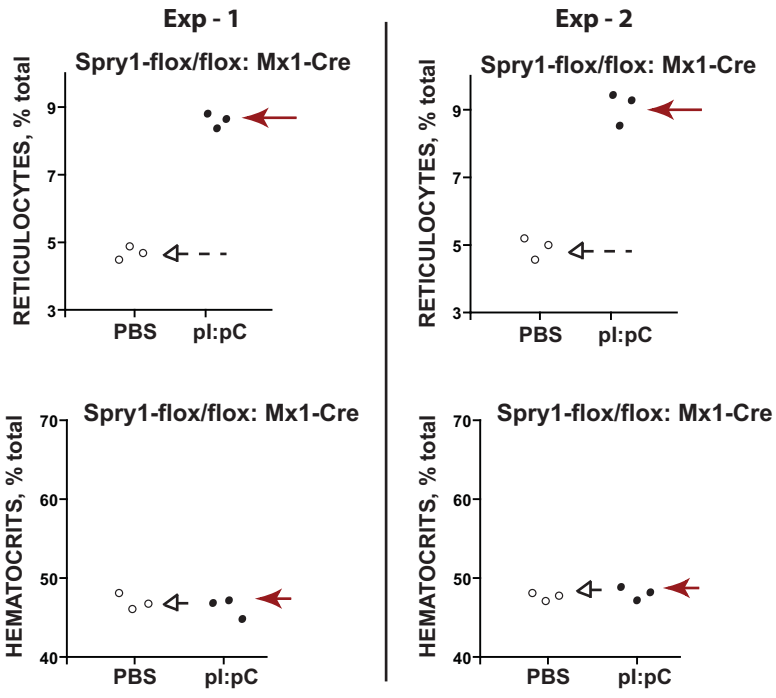

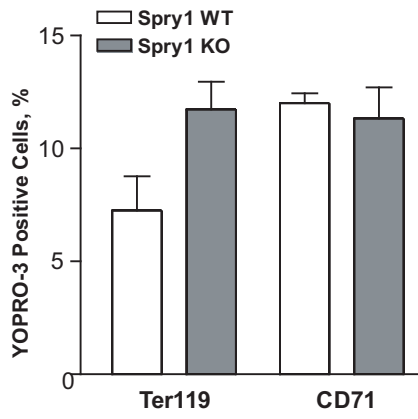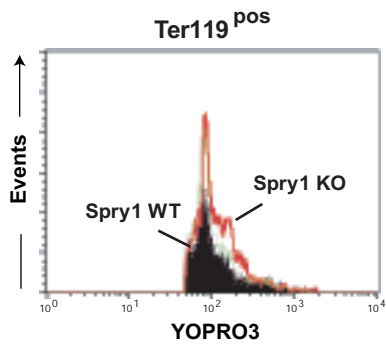



A]

SPRY1 Y53

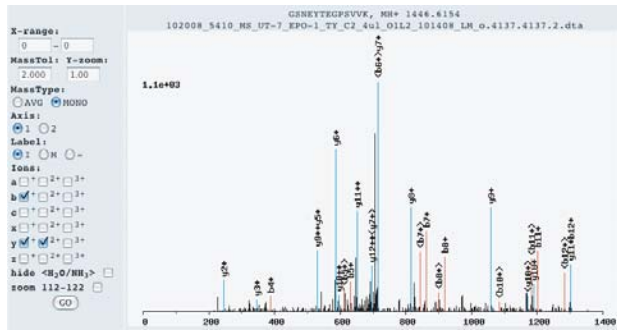

723.8113 m/z, z = 2, MS2 Scan: 4137, CS# 5410, Xcorr = 3.4867

SPRY1 Y53

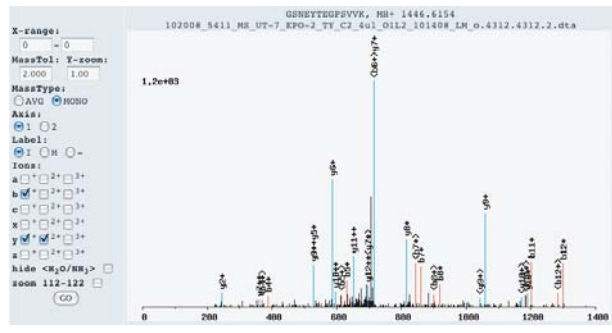

723.8113 m/z, z = 2, MS2 Scan: 4312, CS# 5411, Xcorr = 3.0198

B]

JAK2 Y1008

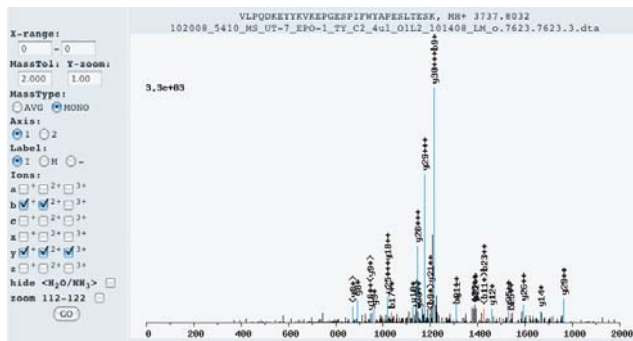

1246.061 m/z, z = 3, MS2 Scan: 7623, CS# 5410, Xcorr = 3.6264

JAK2 Y1007, Y1008

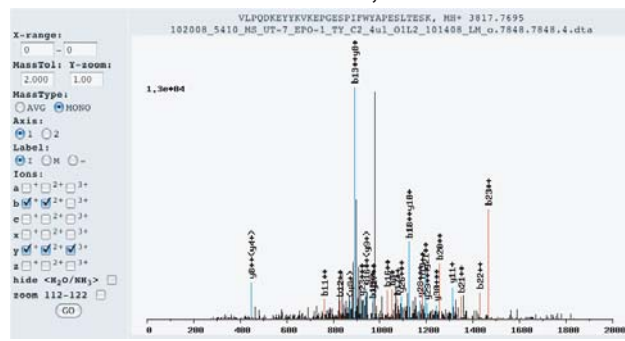

955.1981 m/z, z = 4, MS2 Scan: 7848, CS# 5410, Xcorr = 4.1606

C]

GAB2 Y614

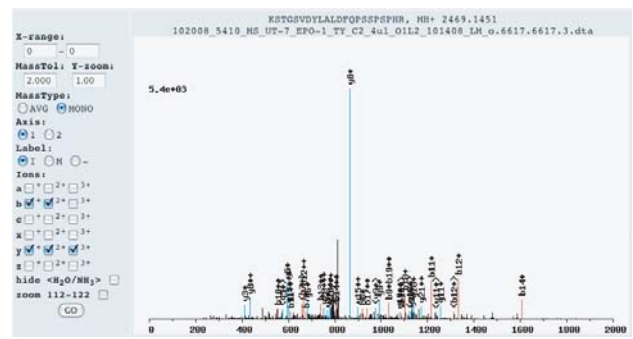

823.7201 m/z, z = 3, MS2 Scan: 6617, CS# 5410, Xcorr = 3.8431

GAB2 Y614

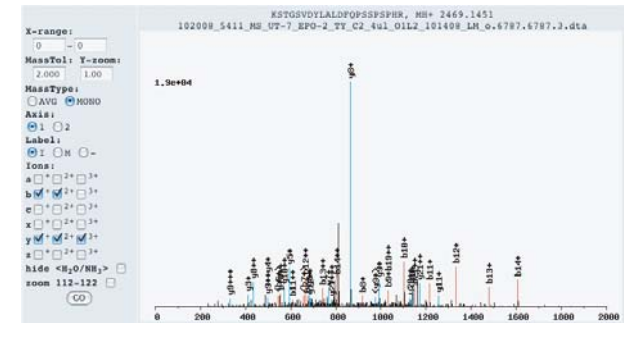

823.7201 m/z, z = 3, MS2 Scan: 6787, CS# 5411, Xcorr = 5.2478

GAB2 Y643

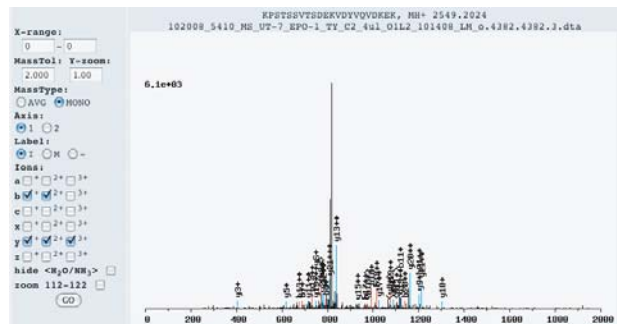

850.4058 m/z, z = 3, MS2 Scan: 4382, CS# 5410, Xcorr = 4.6857

GAB2 Y643

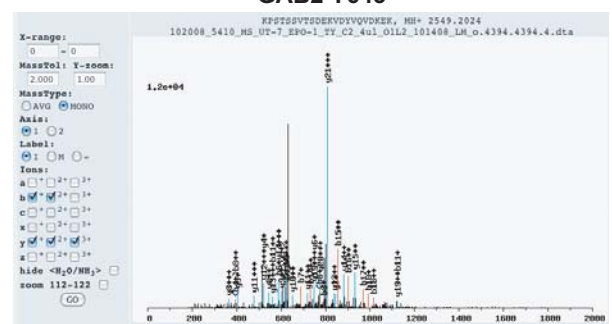

638.0563 m/z, z = 4, MS2 Scan: 4394, CS# 5410, Xcorr = 4.1097

(A)

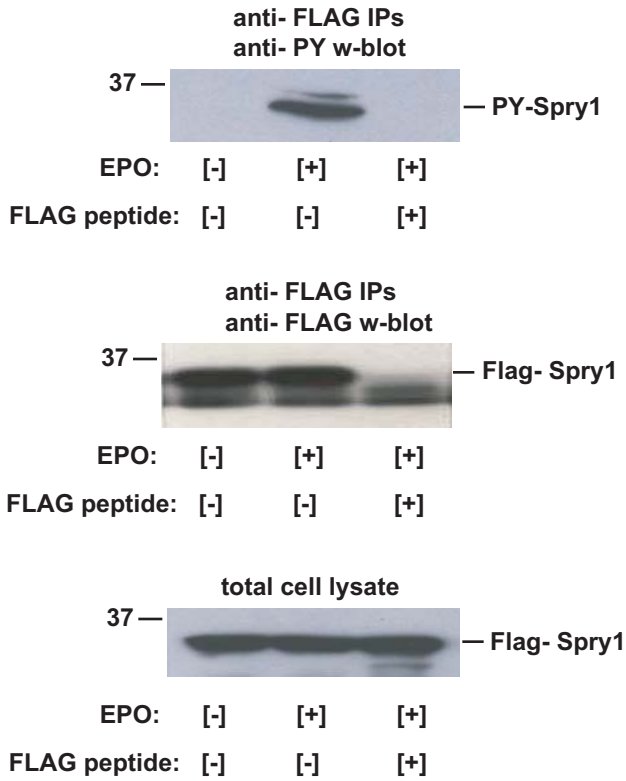

(B)

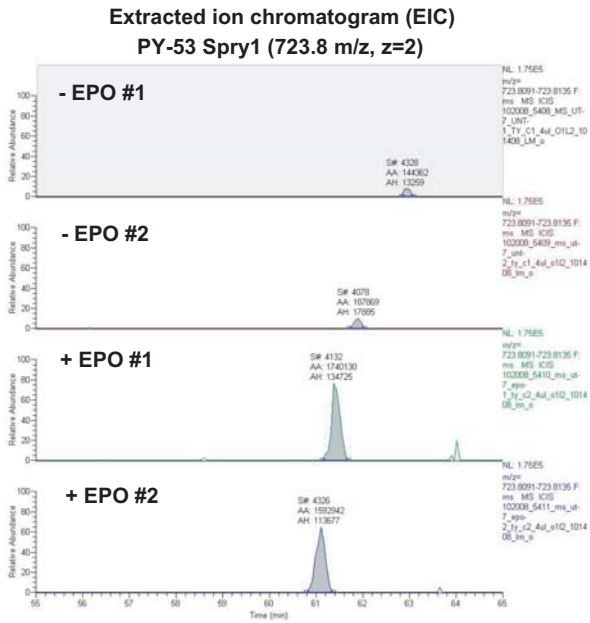

(C) MS/MS spectra

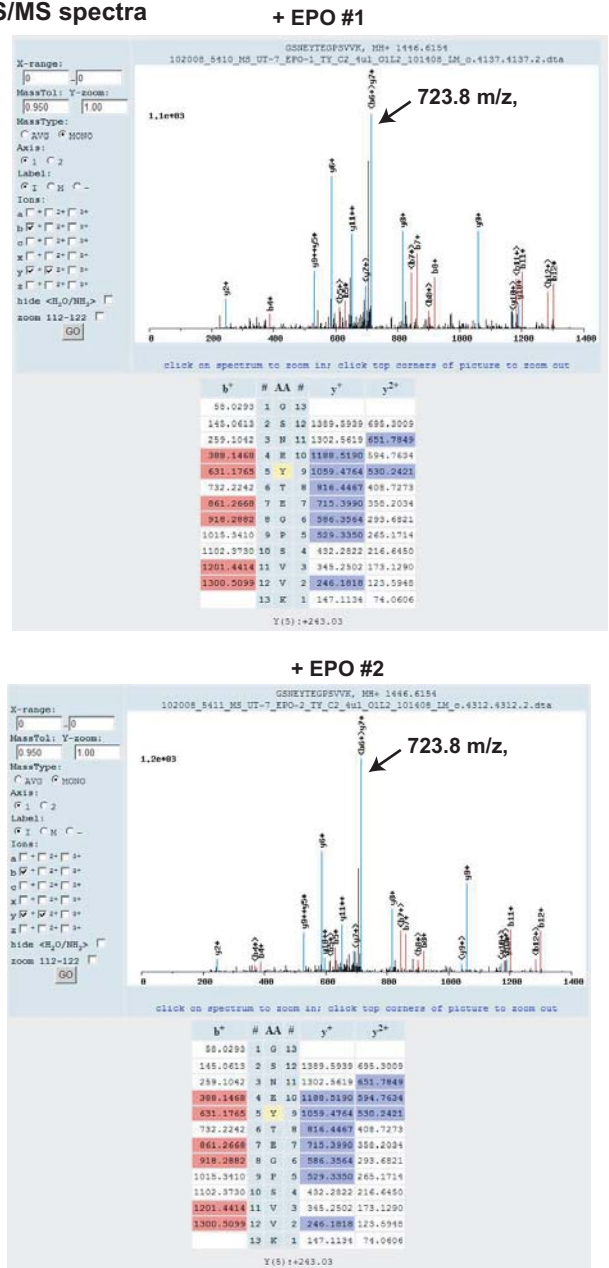

(D)

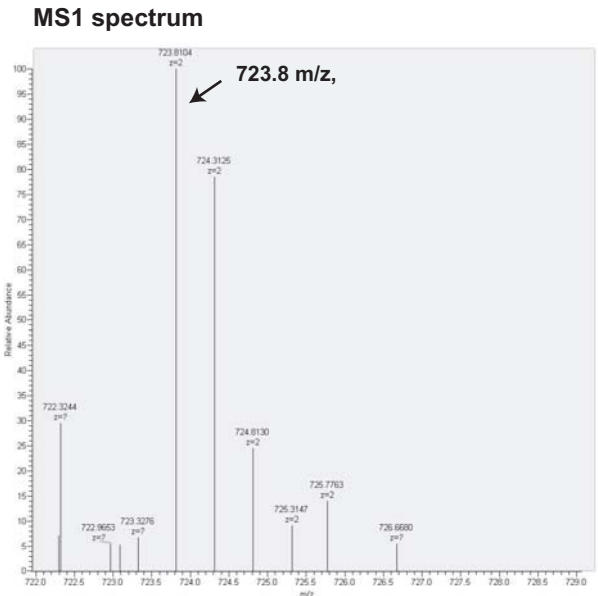

SUPPLEMENTAL FIGURE S-6

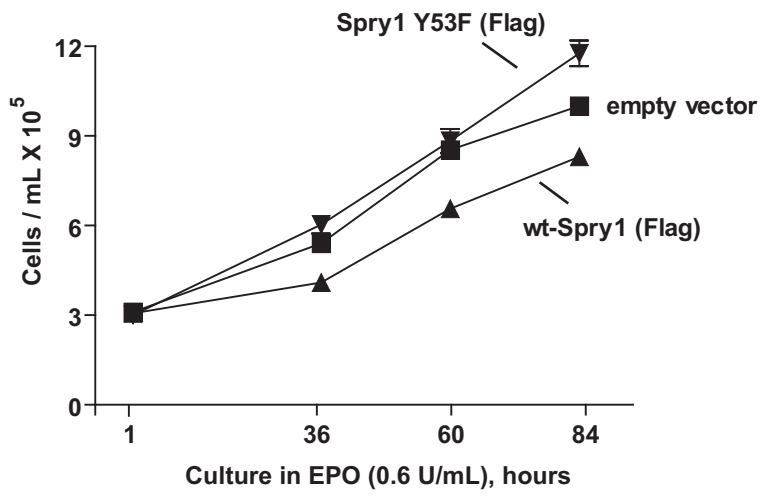

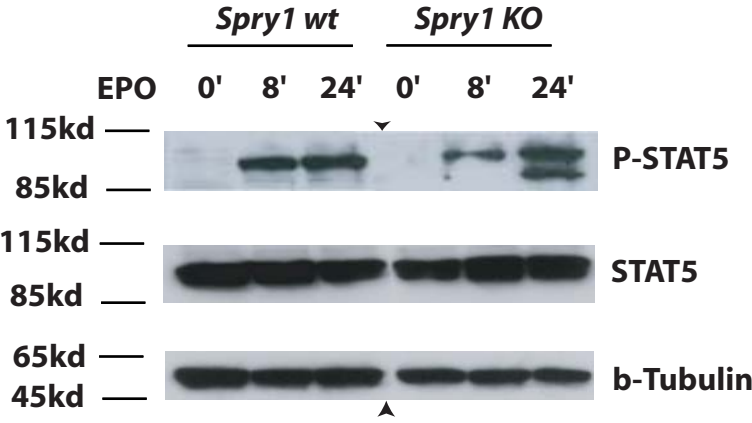

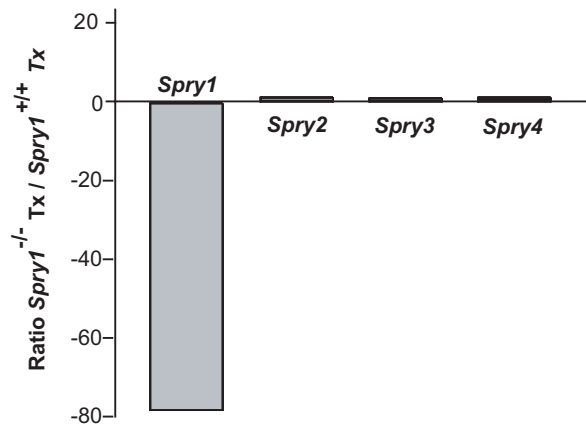

Supplement: supp_blood-2011-11-392571_blood-2011-11-392571-1.pdf [file supp_blood-2011-11-392571_blood-2011-11-392571-1.pdf]
